# Supplementary figures and images for: Impact of the Precursor on the Physicochemical Properties and Photoactivity of TiO2 Nanoparticles Produced in Supercritical CO2
Source: MDPI journal article supplement (doi:10.3390/nano13162328), 2023-08-13

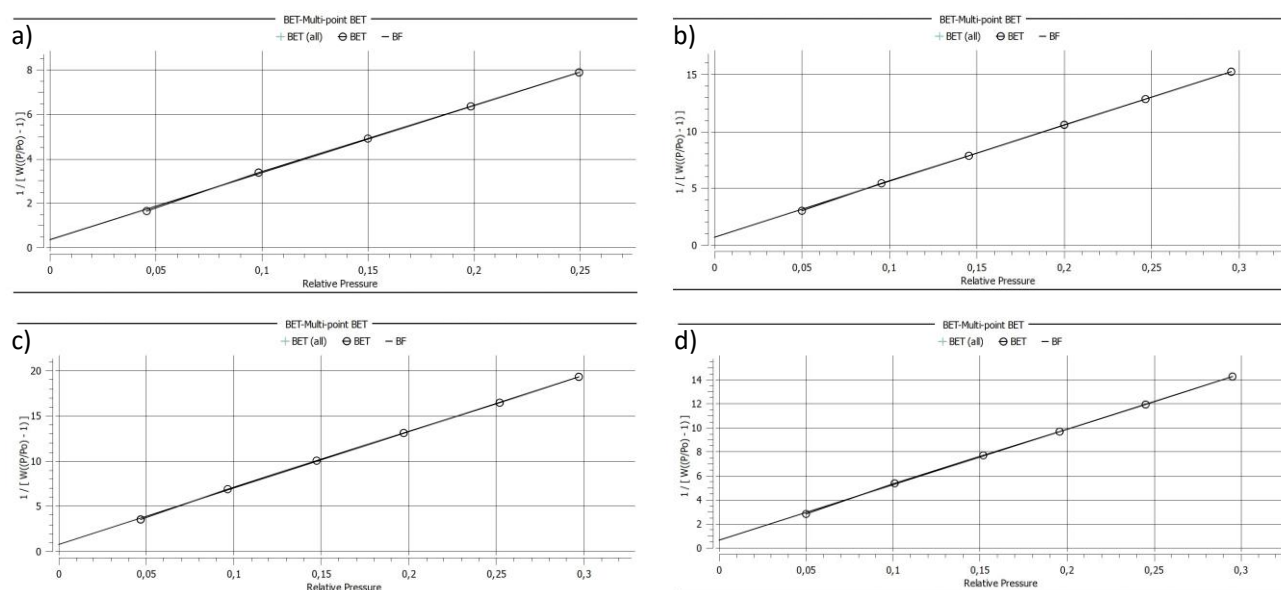

**Figure S1.** Isothermal adsorption/desorption graphs for some catalysts: a) TDB-30, b) TIP-30, c) TBO-30, d) TEO-30.

Supplement: s1 [file s1]
